# Supplementary material
Source: Elsevier journal article supplement (https://www.sciencedirect.com/science/article/pii/S0213911113001647)
Supplement: mmc1 [file S0213911113001647:mmc1.doc]

Appendix 1. Interview guide (original, in Spanish)

**Entrevista con informantes clave en Comunidades Autónomas**

**Estimada colega**

Muchas gracias por acceder a la entrevista. Durante la misma voy a hacerle preguntas sobre su experiencia y opiniones del proceso de integración de la actuación en violencia de género (VBG) en el sistema de salud de su comunidad autónoma.

La entrevista se centrará en su experiencia y percepción sobre el proceso de integrar la actuación sanitaria en violencia de género. El objetivo de la entrevista es recoger la “historia” del proceso de integrar la actuación en violencia de género en el sistema de salud desde su mirada, y sus reflexiones sobre las acciones que se han llevado a cabo (políticas, programas, protocolos, actividades), los resultados y los desafíos en el proceso.

Si algo no está claro, podremos aclararlo durante la entrevista o puede usted contactarme a mi correo electrónico XXX.

**Preguntas de la entrevista:**

**General:**

¿Cómo se dio en [nombre de la comunidad autónoma] la integración de la actuación en VBG en el Sistema de Salud?

¿En qué momento está ahora?

Principales logros y por qué cree que se dieron.

Dificultades y desafíos.

¿Cómo ve el proceso ahora con todos los cambios políticos/económicos que se están dando? ¿Qué desafíos hay para mantenerlo/afianzarlo?

**Contexto político y redes:**

¿Está la actuación en violencia de género incluida en la cartera de servicios de atención primaria? ¿En los contratos programa? ¿Cómo? ¿Existen otros mecanismos que garanticen la institucionalización de la integración de VBG en el sistema sanitario?

¿Existe algún espacio de coordinación interinstitucional en materia de VBG? ¿Cuál? ¿Quiénes lo integran? ¿Cuál es el papel del sector sanitario?

Dentro del sistema sanitario, ¿existe alguna figura de coordinación en la actuación en VBG? ¿Una persona o un comité?

¿Cómo ha participado la Comunidad Autónoma en los grupos de trabajo de la Comisión de VBG del Consejo Interterritorial del SNS?

¿Existe un protocolo interinstitucional para la actuación en VBG en [Nombre de la comunidad autónoma]? ¿Cómo se diseñó y cuál fue el papel del sector sanitario? Fortalezas y debilidades.

**Formación:**

¿Cómo se ha desarrollado? ¿Qué contenidos se han abordado? Perfil del profesorado y de los/as participantes.

Mecanismos para promover participación del personal.

Principales logros y dificultades.

**Monitoreo:**

¿Hay mecanismos para apoyar en el de-briefing al personal sanitario que aborda casos de VBG? ¿Cuáles son?

¿Hay mecanismos para recoger las opiniones de las mujeres sobre la atención brindada? ¿Cuáles son?

¿Existen datos desagregados por áreas de salud, zonas básicas, centro de salud?

**Protocolo:**

¿Existe un protocolo o guía de actuación propio? ¿En qué año se publicó?

¿Cómo se elaboró el protocolo? ¿Quiénes participaron en su elaboración? ¿Se ha actualizado? ¿Cuándo?

¿Cómo se monitorea el cumplimiento del protocolo en los servicios? Fortalezas y desafíos en la implementación del protocolo.

**Promoción y prevención:**

¿Se han desarrollado actividades promocionales o preventivas en temas de VBG desde el sistema sanitario en [Nombre de la Comunidad Autónoma]? ¿Cuáles? Logros y desafíos.

**Mujeres en situación de especial vulnerabilidad:**

¿Se han desarrollado acciones encaminadas a mejorar la atención en VBG a mujeres en situaciones de vulnerabilidad? ¿Cuáles? Principales logros y desafíos.

**Otra información:**

¿Ha recibido la comunidad o alguna experiencia dentro de la Comunidad algún premio o reconocimiento por el trabajo en actuación en VBG en el sistema sanitario?

¿Hay evaluaciones previas o investigaciones relacionadas con la actuación en VBG en el sistema sanitario de [Nombre de la Comunidad Autónoma]?
